# Supplementary material for: Modified SVPWM technique for CMV reduction in asymmetrical dual three phase induction machine drive
Source: PubMed Central journal article supplement (PMC10719323; doi:10.1038/s41598-023-48339-3), 2023-12-13
Supplement: 41598_2023_48339_MOESM1_ESM.pdf [file 41598_2023_48339_MOESM1_ESM.pdf]

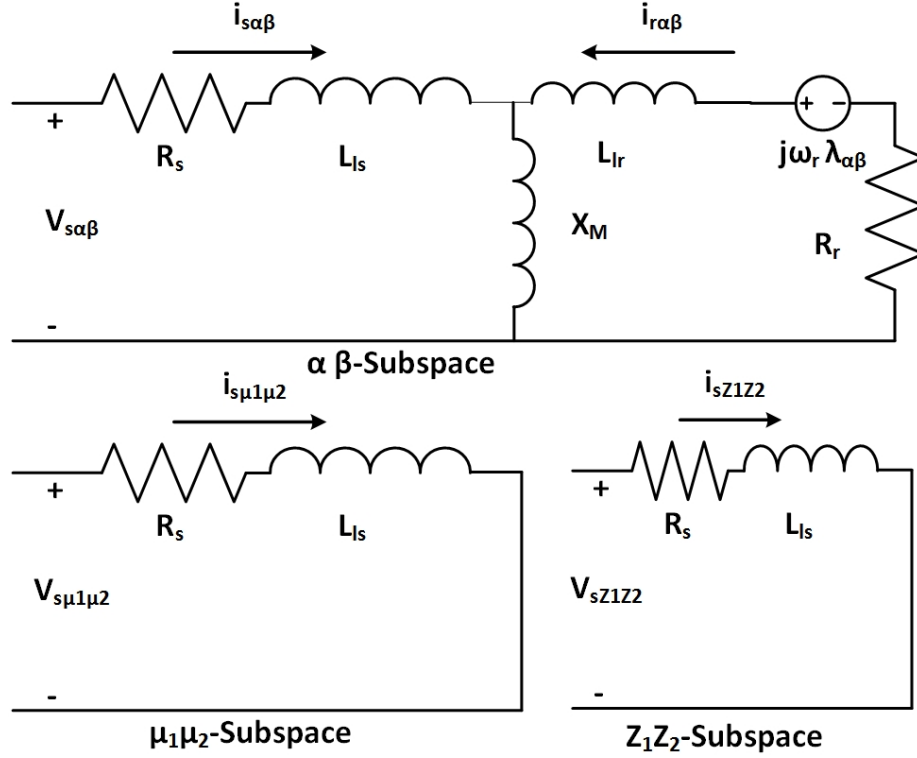

Figure 1: Equivalent circuit in  $\alpha - \beta - \mu_1 - \mu_2 - z_1 - z_2$

## 1. Appendix :Modelling

Modeling of Dual Three Phase Induction Machine using VSD method The Equivalent circuit in  $\alpha - \beta - \mu_1 - \mu_2 - z_1 - z_2$  is shown in Fig. 1

The stator voltage equation for a dual three-phase induction machine is,

$$\begin{aligned}
 [v_s] &= [R_s][i_s] + p([\lambda_s]) \\
 &= [R_s][i_s] + p([\lambda_{ss}] + [\lambda_{sr}]) \\
 &= [R_s][i_s] + p([L_{ss}][i_s] + [L_{sr}][i_r])
 \end{aligned} \tag{1}$$

The rotor voltage equation is,

$$\begin{aligned}
 [v_r] &= [R_r][i_r] + p([\lambda_r]) \\
 &= [R_r][i_r] + p([\lambda_{rr}] + [\lambda_{rs}]) \\
 &= [R_r][i_r] + p([L_{rr}][i_r] + [L_{rs}][i_s])
 \end{aligned} \tag{2}$$

The machine voltage equation in the  $\alpha - \beta - \mu_1 - \mu_2 - z_1 - z_2$  subspace is presented below:

**I) Machine Model in  $\alpha - \beta$  subspace:**

The stator voltage equation is

$$\begin{aligned} \begin{bmatrix} v_{ds} \\ v_{qs} \end{bmatrix} &= \begin{bmatrix} r_s & 0 \\ 0 & r_s \end{bmatrix} \begin{bmatrix} i_{ds} \\ i_{qs} \end{bmatrix} + \\ \frac{d}{dt} &\left\{ \begin{bmatrix} L_{ls} + 3L_{ms} & 0 \\ 0 & L_{ls} + 3L_{ms} \end{bmatrix} \begin{bmatrix} i_{ds} \\ i_{qs} \end{bmatrix} \right\} \\ + \frac{d}{dt} &\left\{ L_{ms} \begin{bmatrix} 3\cos(\theta_r) & -3\sin(\theta_r) \\ 3\sin(\theta_r) & \cos(\theta_r) \end{bmatrix} \begin{bmatrix} i_{dr} \\ i_{qr} \end{bmatrix} \right\} \end{aligned} \quad (3)$$

The rotor voltage equation is

$$\begin{aligned} \begin{bmatrix} 0 \\ 0 \end{bmatrix} &= \begin{bmatrix} r_r & 0 \\ 0 & r_r \end{bmatrix} \begin{bmatrix} i_{dr} \\ i_{qr} \end{bmatrix} + \\ \frac{d}{dt} &\left\{ \begin{bmatrix} L_{lr} + 3L_{ms} & 0 \\ 0 & L_{lr} + 3L_{ms} \end{bmatrix} \begin{bmatrix} i_{dr} \\ i_{qr} \end{bmatrix} \right\} + \\ \frac{d}{dt} &\left\{ \frac{N_r}{N_s} L_{ms} \begin{bmatrix} 3\cos(\theta_r) & 3\sin(\theta_r) \\ -3\sin(\theta_r) & \cos(\theta_r) \end{bmatrix} \begin{bmatrix} i_{ds} \\ i_{qs} \end{bmatrix} \right\} \end{aligned} \quad (4)$$

**II) Motor model in  $\mu_1 - \mu_2$  subspace:**

The stator equation is

$$\frac{d}{dt} \begin{bmatrix} i_{z1s} \\ i_{z2s} \end{bmatrix} = \begin{bmatrix} -\frac{r_s}{L_{ls}} & 0 \\ 0 & -\frac{r_s}{L_{ls}} \end{bmatrix} \begin{bmatrix} i_{z1s} \\ i_{z2s} \end{bmatrix} + \begin{bmatrix} -\frac{1}{L_{ls}} & 0 \\ 0 & -\frac{1}{L_{ls}} \end{bmatrix} \begin{bmatrix} v_{z1s} \\ v_{z2s} \end{bmatrix} \quad (5)$$

The rotor equation is

$$\frac{d}{dt} \begin{bmatrix} i_{z1r} \\ i_{z2r} \end{bmatrix} = \begin{bmatrix} -\frac{r_r}{L_{lr}} & 0 \\ 0 & -\frac{r_r}{L_{lr}} \end{bmatrix} \begin{bmatrix} i_{z1r} \\ i_{z2r} \end{bmatrix} \quad (6)$$

**III) Machine model in  $z_1 - z_2$  subspace:**

The stator equation is

$$\frac{d}{dt} \begin{bmatrix} i_{01s} \\ i_{02s} \end{bmatrix} = \begin{bmatrix} -\frac{r_s}{L_{ls}} & 0 \\ 0 & -\frac{r_s}{L_{ls}} \end{bmatrix} \begin{bmatrix} i_{01s} \\ i_{02s} \end{bmatrix} + \begin{bmatrix} -\frac{1}{L_{ls}} & 0 \\ 0 & -\frac{1}{L_{ls}} \end{bmatrix} \begin{bmatrix} v_{01s} \\ v_{02s} \end{bmatrix} \quad (7)$$

The rotor equation is

$$\frac{d}{dt} \begin{bmatrix} i_{01r} \\ i_{02r} \end{bmatrix} = \begin{bmatrix} -\frac{r_r}{L_{lr}} & 0 \\ 0 & -\frac{r_r}{L_{lr}} \end{bmatrix} \begin{bmatrix} i_{01r} \\ i_{02r} \end{bmatrix} \quad (8)$$

In the above formulation, the stator mutual leakage inductance is neglected, and therefore equations (5),(6),(7), and (8) have the same parameters. If mutual leakage inductance is considered, it will lead to a different formulation, but it does not contribute to the machine excitation. Hence, it will not affect the machine performance [? ]. All the components responsible for electro-mechanical energy conversion lie on the d-q subspace, and non-electro-mechanical components belong to  $z_1 - z_2$  and  $0_1 - 0_2$  subspace. Thus, the dynamic equations of

the machine are completely decoupled. So it is easy for complex control strategy implementation, which is not in the case of conventional  $d - q$  modeling. Further, rotor variables are transformed into stationary reference frames by applying the rotational transformation. The transformation matrix used is given as follows:

$$[T_r^s] = \begin{bmatrix} \cos(\theta_r) & -\sin(\theta_r) \\ \sin(\theta_r) & \cos(\theta_r) \end{bmatrix} \quad (9)$$

The combined stator and rotor equations in stationary reference frame obtained after applying the above transformation to equations (3) and (4) are:

$$\begin{bmatrix} v_{ds}^s \\ v_{qs}^s \\ 0 \\ 0 \end{bmatrix} = \begin{bmatrix} r_s + L_s p & 0 & M_p & 0 \\ 0 & r_s + L_s p & 0 & M_p \\ M_p & \omega_r M & r_r + L_r p & \omega_r L_r \\ -\omega_r M & M_p & -\omega_r L_r & r_r + L_r p \end{bmatrix} \begin{bmatrix} i_{ds}^s \\ i_{qs}^s \\ i_{dr}^s \\ i_{qr}^s \end{bmatrix} \quad (10)$$

where,

$$\begin{aligned} p &= \frac{d}{dt} \\ L_s &= L_{ls} + 3L_{ms} \\ L_r &= L_{lr} + 3L_{ms} \\ M &= 3L_{ms} \end{aligned}$$

The torque developed in the machine is given by

$$T_e = \frac{1}{2} [i]^T \left( \frac{\partial}{\partial \theta_r} [L] \right) [i] \quad (11)$$

which is simplified as

$$\begin{aligned} T_e &= 3L_{ms} [i_{qs}^s (r_{dr}^r \cos(\theta_r) - r_{qr}^r \sin(\theta_r)) \\ &\quad - i_{ds}^s (r_{dr}^r \sin(\theta_r) + r_{qr}^r \cos(\theta_r))] \\ &= 3L_{ms} \frac{P}{2} (i_{qs}^s \cdot i_{dr}^s - i_{ds}^s \cdot i_{qr}^s) \end{aligned} \quad (12)$$

where P, is the number poles in the machine.
